# Supplementary material
Source: PubMed Central journal article supplement (PMC10651798)
Supplement: NIHMS1881269-supplement-Supplemental_Digital_Content_to_Be_Published__cited_in_text_.pdf [file NIHMS1881269-supplement-Supplemental_Digital_Content_to_Be_Published__cited_in_text_.pdf]

**Supplemental Table 1a. Demographic and Clinical Characteristics of Liver Transplant Donors whose livers were transplanted into HCC or non-HCC recipient in pre- and post-policy periods.** Numbers represent total count (%) and means (SD). Post-policy, pre-COVID period was defined as the timeframe between 5/20/2019 – 3/13/2020 and post-policy, COVID time was defined as the timeframe between 3/14/2020 – 3/1/2021.

| Variable                      | non-HCC               |                                       |                                  |         | HCC                   |                                       |                                  |         |
|-------------------------------|-----------------------|---------------------------------------|----------------------------------|---------|-----------------------|---------------------------------------|----------------------------------|---------|
|                               | pre-MMaT-3<br>N=8,385 | post-policy; pre-<br>COVID<br>N=4,251 | Post-policy;<br>COVID<br>N=5,282 | p-value | pre-MMaT-3<br>N=2,954 | post-policy; pre-<br>COVID<br>N=1,079 | post-policy;<br>COVID<br>N=1,213 | p-value |
| <b><u>DONOR</u></b>           |                       |                                       |                                  |         |                       |                                       |                                  |         |
| <b>Age</b>                    | 41.23 (15.66)         | 41.20 (15.69)                         | 40.52 (14.99)                    | 0.02    | 42.97 (16.56)         | 44.29 (16.38)                         | 45.24 (16.12)                    | <0.001  |
| <b>Gender</b>                 |                       |                                       |                                  | 0.62    |                       |                                       |                                  | 0.91    |
| Male                          | 5,125 (61.1%)         | 2,634 (62.0%)                         | 3,257 (61.7%)                    |         | 1,783 (60.4%)         | 645 (59.8%)                           | 640 (61.2%)                      |         |
| Female                        | 3,260 (38.9%)         | 1,617 (38.0%)                         | 2,025 (38.3%)                    |         | 1,171 (39.6%)         | 434 (40.2%)                           | 405 (38.8%)                      |         |
| <b>Race</b>                   |                       |                                       |                                  | 0.92    |                       |                                       |                                  | 0.76    |
| White                         | 5,365 (64.0%)         | 2,719 (64.0%)                         | 3,362 (63.7%)                    |         | 1,938 (65.6%)         | 692 (64.1%)                           | 743 (61.3%)                      |         |
| Non-White                     | 3,020 (36.0%)         | 1,532 (36.0%)                         | 1,920 (36.3%)                    |         | 1,016 (34.4%)         | 387 (35.9%)                           | 470 (38.7%)                      |         |
| <b>Ethnicity</b>              |                       |                                       |                                  | 0.33    |                       |                                       |                                  | 0.87    |
| Latino                        | 1,222 (14.6%)         | 652 (15.3%)                           | 754 (14.3%)                      |         | 397 (13.4%)           | 152 (14.1%)                           | 166 (13.7%)                      |         |
| Non-Latino                    | 7,163 (85.4%)         | 3,599 (84.7%)                         | 4,528 (85.7%)                    |         | 2,557 (86.6%)         | 927 (85.9%)                           | 1,047 (86.3%)                    |         |
| <b>Donor/s Cause of Death</b> |                       |                                       |                                  | 0.001   |                       |                                       |                                  | 0.006   |
| Anoxia                        | 3,517 (41.9%)         | 1,927 (45.3%)                         | 2,392 (45.3%)                    |         | 1,248 (42.2%)         | 492 (45.6%)                           | 534 (44.0%)                      |         |
| CVA                           | 2,265 (27.0%)         | 1,079 (25.4%)                         | 1,309 (24.8%)                    |         | 884 (29.9%)           | 324 (30.0%)                           | 374 (30.8%)                      |         |
| Head Trauma                   | 2,390 (28.5%)         | 1,151 (27.1%)                         | 1,438 (27.2%)                    |         | 758 (25.7%)           | 238 (22.1%)                           | 261 (21.5%)                      |         |
| CNS Tumor                     | 30 (0.4%)             | 10 (0.2%)                             | 14 (0.3%)                        |         | 13 (0.4%)             | 3 (0.3%)                              | 4 (0.3%)                         |         |

|                                          |               |               |               |        |               |               |              |        |
|------------------------------------------|---------------|---------------|---------------|--------|---------------|---------------|--------------|--------|
| Other                                    | 183 (2.2%)    | 84 (2.0%)     | 129 (2.4%)    |        | 51 (1.7%)     | 22 (2.0%)     | 40 (3.3%)    |        |
| <b>BMI</b>                               | 28.28 (6.71)  | 28.26 (6.98)  | 28.19 (6.59)  | 0.72   | 28.37(6.63)   | 28.546 (6.97) | 29.40 (7.52) | <0.001 |
| <b>Donor Aged 70 or More</b>             | 279 (3.3%)    | 143 (3.4%)    | 126 (2.4%)    | 0.003  | 145 (4.9%)    | 72 (6.7%)     | 64 (5.3%)    | 0.09   |
| <b>Donation After Cardiac Death</b>      | 657 (7.8%)    | 382 (9.0%)    | 491 (9.3%)    | 0.006  | 245 (8.3%)    | 138 (12.8%)   | 195 (16.1%)  | <0.001 |
| <b>Organ Shared Nationally</b>           | 3,315 (39.5%) | 1,702 (40.0%) | 3,516 (66.6%) | <0.001 | 721 (24.4%)   | 319 (29.6%)   | 553 (45.6%)  | <0.001 |
| <b>DRI</b>                               | 1.45 (.41)    | 1.45 (.42)    | 1.50 (.41)    | <0.001 | 1.46 (.41)    | 1.53 (.42)    | 1.60 (.44)   | <0.001 |
| <b>Cold Ischemia Time (hours)</b>        | 5.92 (2.12)   | 5.85(1.98)    | 6.07 (2.06)   | <0.001 | 5.91 (2.24)   | 5.94 (2.11)   | 5.94 (1.95)  | 0.9    |
| <b>Warm Ischemia Time (DCD; minutes)</b> | 14.88 (10.58) | 14.70 (9.80)  | 10.95 (11.07) | <0.001 | 15.93 (9.67)  | 15.28 (9.11)  | 14.06 (9.27) | 0.17   |
| <b>Diabetes</b>                          | 1,076 (12.8%) | 550 (12.9%)   | 563 (10.7%)   | <0.001 | 443 (15.0%)   | 165 (15.3%)   | 192 (15.8%)  | 0.79   |
| <b>Donor HCV Ab</b>                      | 736 (8.8%)    | 438 (10.3%)   | 475 (10.5%)   | <0.001 | 327 (11.1%)   | 107 (9.9%)    | 128 (10.6%)  | 0.57   |
| <b>Donor HCV NAT</b>                     | 484 (5.8%)    | 276 (6.5%)    | 349 (6.6%)    | 0.092  | 224 (7.6%)    | 61 (5.7%)     | 74 (7.1%)    | 0.19   |
| <b>High Risk of Disease Transmission</b> | 2,458 (29.3%) | 1,259 (29.6%) | 1,609 (30.5%) | 0.35   | 878 (29.7%)   | 301 (27.9%)   | 332 (27.4%)  | 0.24   |
| <b>Liver Biopsied</b>                    | 3,298 (39.3%) | 1,677 (39.5%) | 2,182 (41.3%) | 0.003  | 1,311 (44.4%) | 503 (46.6%)   | 619 (51.1%)  | <0.001 |
| <b>% Macrovesicular Fat on Biopsy</b>    |               |               |               | 0.49   |               |               |              | 0.086  |
| No Biopsy                                | 5,184 (61.8%) | 2,616 (61.5%) | 3,245 (61.4%) |        | 1,677 (56.8%) | 590 (54.7%)   | 631 (52.0%)  |        |
| 0-14.9% Steatosis                        | 2,461 (29.4%) | 1,282 (30.2%) | 1,606 (30.4%) |        | 1,012 (34.3%) | 384 (35.6%)   | 443 (36.5%)  |        |
| 15-29.9% Steatosis                       | 400 (4.8%)    | 193 (4.5%)    | 251 (4.8%)    |        | 148 (5.0%)    | 61 (5.7%)     | 83 (6.8%)    |        |
| 30+% Steatosis                           | 340 (4.1%)    | 160 (3.8%)    | 180 (3.4%)    |        | 117 (4.0%)    | 44 (4.1%)     | 56 (4.6%)    |        |

**Supplemental Table 1b. Demographic and Clinical Characteristics of Liver Transplant Recipients with and without Exception Points for Hepatocellular Carcinoma in Pre- and Post-policy periods.** Numbers represent total count (%) and means (SD). Post-policy, pre-COVID period was defined as the timeframe between 5/20/2019 – 3/13/2020 and post-policy, COVID time was defined as the timeframe between 3/14/2020 – 3/1/2021.

| Variable                        | non-HCC       |                        |                    |         | HCC           |                        |                    |         |
|---------------------------------|---------------|------------------------|--------------------|---------|---------------|------------------------|--------------------|---------|
|                                 | pre-MMaT-3    | Post-policy; pre-COVID | Post-policy; COVID | p-value | pre-MMaT-3    | post-policy; pre-COVID | Post-policy; COVID | p-value |
|                                 | N=8,385       | N=4,251                | N=5,282            |         | N=2,954       | N=1,079                | N=1,213            |         |
| <b>RECIPIENT</b>                |               |                        |                    |         |               |                        |                    |         |
| <b>Age</b>                      | 54.40 (10.85) | 54.47 (11.23)          | 53.70 (11.40)      | <0.001  | 62.06 (6.74)  | 62.13 (7.29)           | 62.95 (6.77)       | <0.001  |
| <b>Gender:</b>                  |               |                        |                    | 0.08    |               |                        |                    | 0.67    |
| Male                            | 5,341 (63.7%) | 2,656 (62.5%)          | 3,266 (61.8%)      |         | 2,281 (77.2%) | 838 (77.7%)            | 924 (76.2%)        |         |
| Female                          | 3,044 (36.3%) | 1,595 (37.5%)          | 2,016 (38.2%)      |         | 673 (22.8%)   | 241 (22.3%)            | 289 (23.8%)        |         |
| <b>Race</b>                     |               |                        |                    | 0.75    |               |                        |                    | 0.032   |
| White                           | 6,090 (72.6%) | 3,106 (73.1%)          | 3,274 (72.2%)      |         | 1,957 (66.2%) | 697 (64.6%)            | 752 (62.0%)        |         |
| Non-White                       | 2,295 (27.4%) | 1,145 (26.9%)          | 1,261 (27.8%)      |         | 997 (33.8%)   | 382 (35.4%)            | 461 (38.0%)        |         |
| <b>Ethnicity</b>                |               |                        |                    | 0.21    |               |                        |                    | <0.001  |
| Latino                          | 1,279 (15.3%) | 678 (15.9%)            | 864 (16.4%)        |         | 513 (17.4%)   | 208 (19.3%)            | 276 (22.8%)        |         |
| Non-Latino                      | 7,106 (84.7%) | 3,573 (84.1%)          | 4,418 (83.6%)      |         | 2,441 (82.6%) | 871 (80.7%)            | 937 (77.2%)        |         |
| <b>Lab MELD at Transplant</b>   | 25.97 (9.02)  | 25.50 (8.91)           | 26.26 (8.83)       | <0.001  | 12.69 (6.17)  | 13.15 (6.63)           | 13.41 (6.84)       | 0.002   |
| <b>Match MELD at Transplant</b> | 28.36 (8.70)  | 27.80 (8.68)           | 28.64 (8.40)       | <0.001  | 28.15 (4.99)  | 26.14 (5.13)           | 24.99 (5.26)       | <0.001  |
| <b>Primary Diagnosis</b>        |               |                        |                    | <0.001  |               |                        |                    | <0.001  |
| HCV                             | 808 (9.6%)    | 262 (6.2%)             | 241 (4.6%)         | <0.001  | 783 (26.5%)   | 239 (22.2%)            | 213 (17.6%)        |         |
| Alcohol                         | 3,431 (40.9%) | 1,910 (44.9%)          | 2,511 (47.5%)      |         | 407 (13.8%)   | 169 (15.7%)            | 156 (12.9%)        |         |
| NASH                            | 1,951 (23.3%) | 1,022 (24.0%)          | 1,205 (22.8%)      |         | 283 (9.6%)    | 130 (12.0%)            | 168 (13.8%)        |         |

|                                              |                 |                 |                 |        |                 |                 |                 |      |
|----------------------------------------------|-----------------|-----------------|-----------------|--------|-----------------|-----------------|-----------------|------|
| HCC                                          | 151 (1.8%)      | 71 (1.7%)       | 78 (1.5%)       |        | 1,241 (42.0%)   | 459 (42.5%)     | 565 (46.6%)     |      |
| Other                                        | 2,044 (24.4%)   | 986 (23.2%)     | 1,247 (23.6%)   |        | 240 (8.1%)      | 82 (7.6%)       | 111 (9.2%)      |      |
| <b>Waiting Time (Days)</b>                   | 172.74 (410.39) | 161.03 (368.19) | 147.22 (395.22) | 0.001  | 372.93 (483.86) | 358.78 (425.15) | 332.09 (391.82) | 0.03 |
| <b>BMI:</b>                                  | 29.16 (9.23)    | 29.44 (6.33)    | 29.75 (14.58)   | 0.06   | 29.72 (9.07)    | 29.35 (6.76)    | 29.79 (5.63)    | 0.15 |
| <b>ABO Blood Type</b>                        |                 |                 |                 | 0.68   |                 |                 |                 | 0.58 |
| A                                            | 3,033 (36.2%)   | 1,548 (36.4%)   | 1,950 (36.9%)   |        | 1,131 (38.3%)   | 393 (36.4%)     | 428 (35.3%)     |      |
| AB                                           | 454 (5.4%)      | 224 (5.3%)      | 281 (5.3%)      |        | 125 (4.2%)      | 46 (4.3%)       | 61 (5.0%)       |      |
| B                                            | 1,196 (14.3%)   | 581 (13.7%)     | 693 (13.1%)     |        | 393 (13.3%)     | 146 (13.5%)     | 172 (14.2%)     |      |
| O                                            | 3,702 (44.2%)   | 1,898 (44.6%)   | 2,358 (44.6%)   |        | 1,305 (44.2%)   | 494 (45.8%)     | 552 (45.5%)     |      |
| <b>On Life Support at Transplant</b>         | 1,016 (12.1%)   | 435 (10.2%)     | 417 (7.9%)      | <0.001 | 30 (1.0%)       | 16 (1.5%)       | 14 (1.2%)       | 0.47 |
| <b>Dialysis Within 1 Week Pre-Transplant</b> | 1,955 (23.3%)   | 911 (21.4%)     | 1,187 (22.5%)   | 0.06   | 72 (2.4%)       | 30 (2.8%)       | 38 (3.1%)       | 0.43 |
| <b>Prior Abdominal Surgery</b>               | 3,639 (43.4%)   | 1,765 (41.5%)   | 2,150 (40.7%)   | 0.005  | 1,342 (45.4%)   | 481 (44.6%)     | 556 (45.8%)     | 0.83 |
| <b>Diabetes</b>                              | 2,347 (28.0%)   | 1,227 (28.9%)   | 1,376 (26.5%)   | 0.03   | 1,104 (37.4%)   | 420 (38.9%)     | 489 (40.3%)     | 0.19 |
| <b>Preoperative Portal Vein Thrombosis</b>   | 708 (8.4%)      | 305 (7.2%)      | 517 (9.8%)      | <0.001 | 231 (7.8%)      | 84 (7.8%)       | 89 (7.3%)       | 0.86 |
| <b>Region</b>                                |                 |                 |                 | 0.005  |                 |                 |                 | 0.03 |
| 1                                            | 279 (3.3%)      | 123 (2.9%)      | 129 (2.4%)      |        | 105 (3.6%)      | 47 (4.4%)       | 38 (3.1%)       |      |
| 2                                            | 956 (11.4%)     | 464 (10.9%)     | 558 (10.6%)     |        | 390 (13.2%)     | 147 (13.6%)     | 163 (13.4%)     |      |
| 3                                            | 1,520 (18.1%)   | 790 (18.6%)     | 1,007 (19.1%)   |        | 424 (14.4%)     | 145 (13.4%)     | 180 (14.8%)     |      |
| 4                                            | 767 (9.1%)      | 419 (9.9%)      | 457 (8.7%)      |        | 336 (11.4%)     | 115 (10.7%)     | 121 (10.0%)     |      |
| 5                                            | 1,256 (15.0%)   | 619 (14.6%)     | 748 (14.2%)     |        | 407 (13.8%)     | 160 (14.8%)     | 214 (17.6%)     |      |
| 6                                            | 265 (3.2%)      | 153 (3.6%)      | 192 (3.6%)      |        | 142 (4.8%)      | 54 (5.0%)       | 50 (4.1%)       |      |
| 7                                            | 672 (8.0%)      | 312 (7.3%)      | 358 (6.8%)      |        | 295 (10.0%)     | 109 (10.1%)     | 99 (8.2%)       |      |
| 8                                            | 590 (7.0%)      | 305 (7.2%)      | 432 (8.2%)      |        | 156 (5.3%)      | 66 (6.1%)       | 79 (6.5%)       |      |
| 9                                            | 286 (3.4%)      | 155 (3.6%)      | 176 (3.3%)      |        | 121 (4.1%)      | 50 (4.6%)       | 51 (4.2%)       |      |
| 10                                           | 830 (9.9%)      | 430 (10.1%)     | 557 (10.5%)     |        | 203 (6.9%)      | 86 (8.0%)       | 95 (7.8%)       |      |
| 11                                           | 964 (11.5%)     | 481 (11.35%)    | 668 (12.6%)     |        | 375 (12.7%)     | 100 (9.3%)      | 123 (10.1%)     |      |

**Supplemental Table 2. Marginal liver characteristics of liver transplant donors whose livers were transplanted into HCC or non-HCC recipients in pre- and post-AC periods.** Numbers represent total count (%) and means (SD).

| Variable                                     | non-HCC            |                    |         | HCC               |                    |         |
|----------------------------------------------|--------------------|--------------------|---------|-------------------|--------------------|---------|
|                                              | pre-AC<br>N=13,336 | post-AC<br>N=4,582 | p-value | pre-AC<br>N=3,893 | post-AC<br>N=1,354 | p-value |
| <b><i>Marginal Liver Characteristics</i></b> |                    |                    |         |                   |                    |         |
| <b>Donation After Cardiac Death</b>          | 968 (8.1%)         | 562 (9.5%)         | 0.002   | 357 (9.2%)        | 219 (16.2%)        | <0.001  |
| <b>Donor Aged 70 or More</b>                 | 405 (3.4%)         | 143 (2.4%)         | <0.001  | 200 (5.1%)        | 81 (6.0%)          | 0.23    |
| <b>DRI</b>                                   | 1.44 (0.41)        | 1.49 (0.41)        | 0.01    | 1.47 (0.41)       | 1.61 (0.42)        | <0.001  |
| <b>Macrosteatosis ≥ 30%</b>                  | 474 (3.9%)         | 206 (3.5%)         | 0.49    | 151 (3.9%)        | 66 (4.9%)          | 0.007   |

**Supplemental Figure 1. Comparison of adjusted percentages of liver transplant (LT) with a marginal quality liver among HCC and non-HCC recipients in pre- and post-AC periods.**

Transplanted livers were classified as marginal if they met  $\geq 1$  of the following: 1) donation after circulatory death; 2) donor age  $\geq 70$ ; 3) macrosteatosis  $\geq 30\%$ ; 4) donor risk index  $\geq 95$ th percentile.

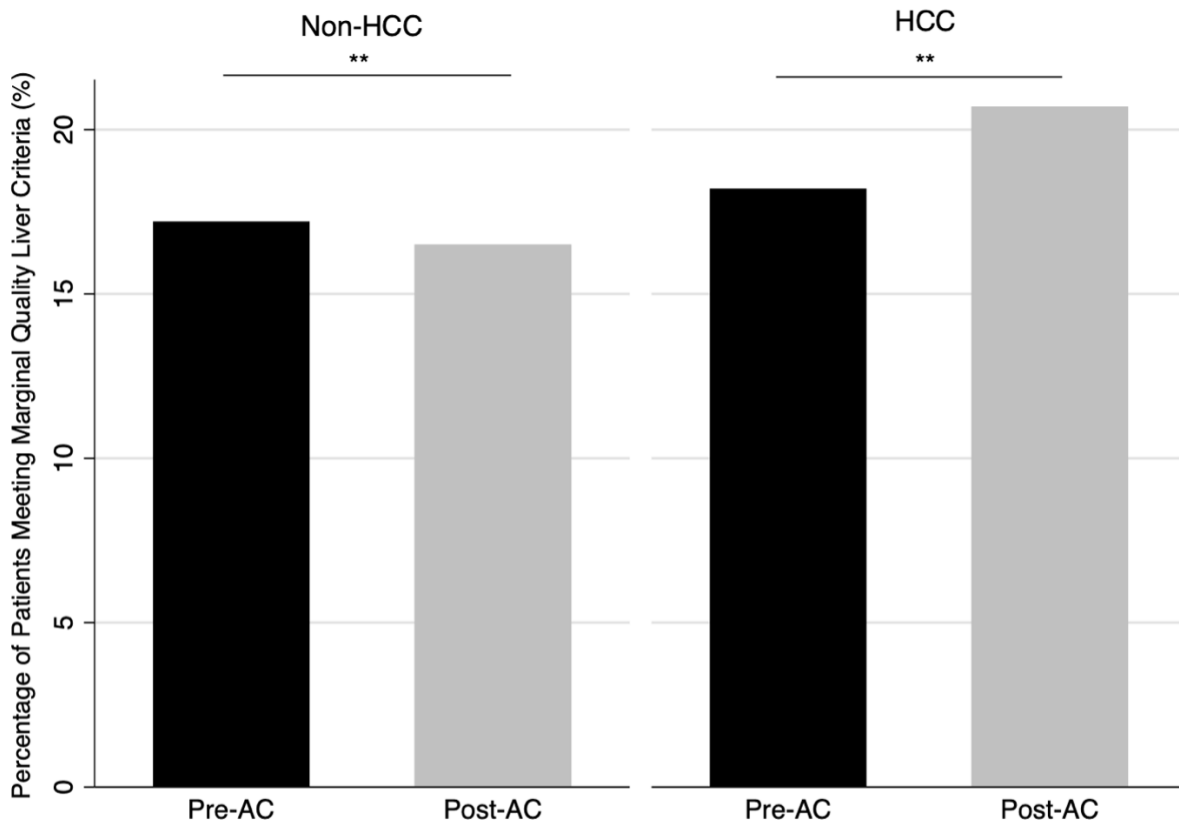

\*\*p-value < 0.01
